# Supplementary material for: Effects of Melatonin on Antioxidant Capacity in Naked Oat Seedlings under Drought Stress
Source: MDPI journal article supplement (doi:10.3390/molecules23071580), 2018-06-29
Supplement: s1 [file s1]

# Supplementary Materials

## Effects of Melatonin on Antioxidant Capacity in Naked Oat Seedlings under Drought Stress

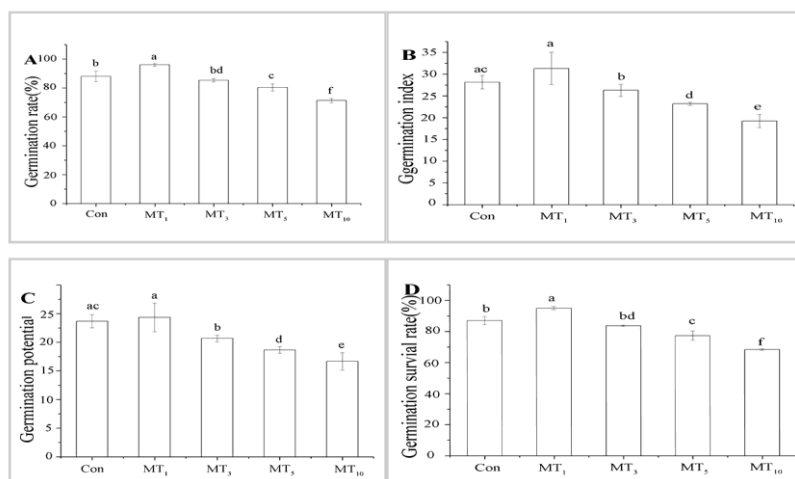

**Figure S1.** Effect of different MT concentrations on germination of naked oat seeds. (A) Germination rate; (B) germination index; (C) germination potential; (D) germination survival rate. Values represent mean  $\pm$  standard deviation ( $n = 3$ ). Different letters (a, b, c, d, e) on the bars indicate significant differences ( $p < 0.05$ ) between different treatments according to Duncan's multiple range test comparison. Control seeds without melatonin pretreatment, Con; seeds pretreated with MT at concentrations of 100  $\mu$ M (MT<sub>1</sub>), 300  $\mu$ M (MT<sub>3</sub>), 500  $\mu$ M (MT<sub>5</sub>), and 1,000  $\mu$ M (MT<sub>10</sub>).

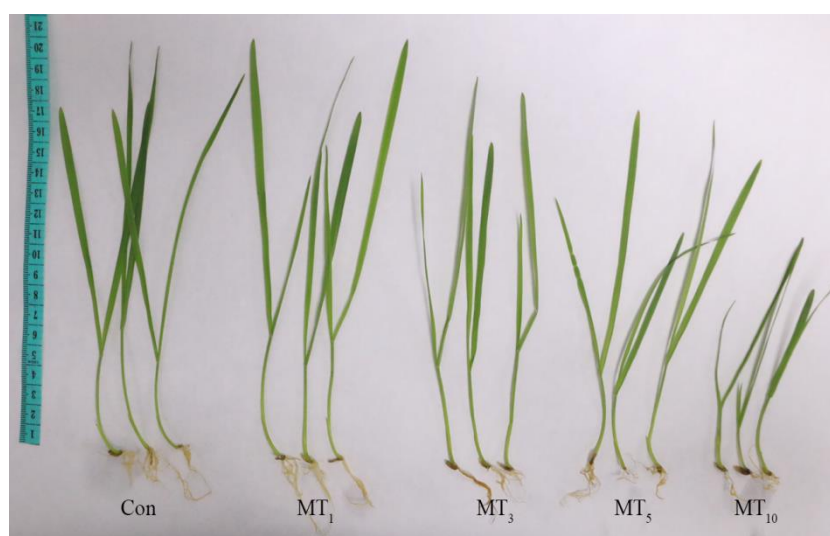

**Figure S2.** Effect of spraying different concentrations of MT on the growth of naked oat seedlings. Photograph was taken after spraying the MT for 1 day. Control seedlings without MT pretreatment, Con; seedlings sprayed with MT at concentrations of 100  $\mu$ M (MT<sub>1</sub>), 300  $\mu$ M (MT<sub>3</sub>), 500  $\mu$ M (MT<sub>5</sub>), and 1,000  $\mu$ M (MT<sub>10</sub>).

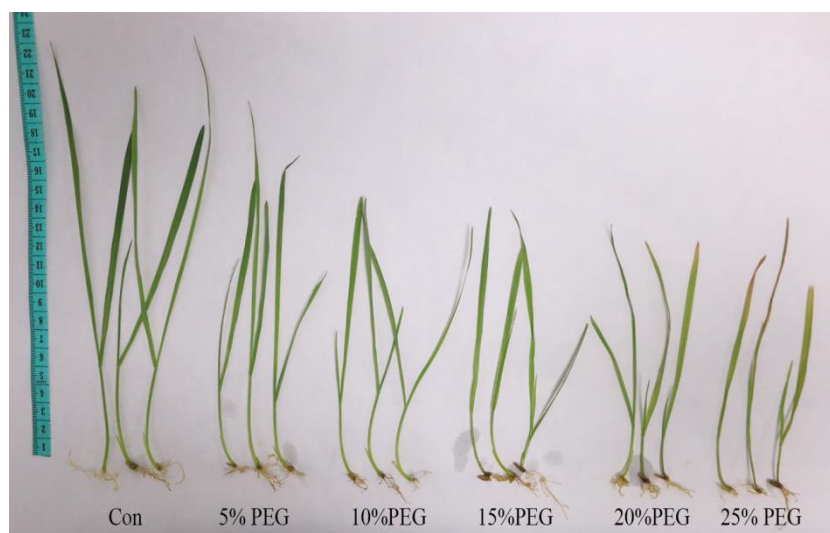

**Figure S3.** Effect of different concentrations of drought stress treatment on the growth of naked oat seedlings. Photograph was taken after drought for 1 day. Control seedlings without drought pretreatment, Con; seedlings pretreated with PEG-6000 at concentrations of 5 % (5 % PEG), 10 % (10 % PEG), 15 % (15 % PEG), 20% (20 % PEG), and 25% (25 % PEG).

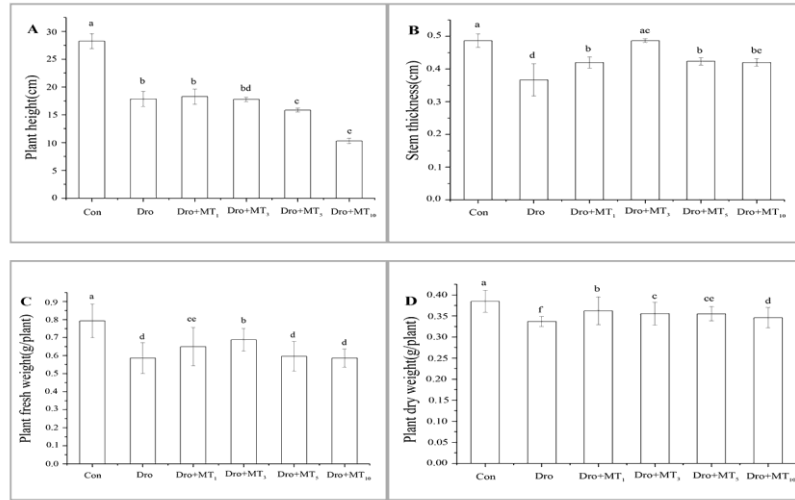

**Figure S4.** Effect of spraying different concentrations of MT on the growth of naked oat seedlings under 20% PEG-6000 drought stress. **(A)** Plant height; **(B)** stem thickness; **(C)** plant fresh weight; **(D)** plant dry weight. Values represent mean  $\pm$  standard deviation ( $n = 3$ ). Different letters on the bars indicate significant differences ( $p < 0.05$ ) between different treatments according to Duncan's multiple range test comparison. Control-untreated, Con; drought (Dro) plus the MT pretreatment at concentrations of 100  $\mu$ M (Dro + MT<sub>1</sub>), 300  $\mu$ M (Dro + MT<sub>3</sub>), 500  $\mu$ M (Dro + MT<sub>5</sub>), and 1,000  $\mu$ M (Dro + MT<sub>10</sub>).
